# Supplementary material for: Improved large-scale hydrological modelling through the assimilation of streamflow and downscaled satellite soil moisture observations
Source: Copernicus journal article supplement (doi:10.5194/hess-20-3059-2016), 2016-07-29
Supplement: Supplementary file 1 [file hess-20-3059-2016-supplement.pdf]

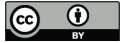

*Supplement of*

## **Improved large-scale hydrological modelling through the assimilation of streamflow and downscaled satellite soil moisture observations**

**Patricia López López et al.**

*Correspondence to:* Patricia López López ([patricia.lopez@deltares.nl](mailto:patricia.lopez@deltares.nl))

The copyright of individual parts of the supplement might differ from the CC-BY 3.0 licence.

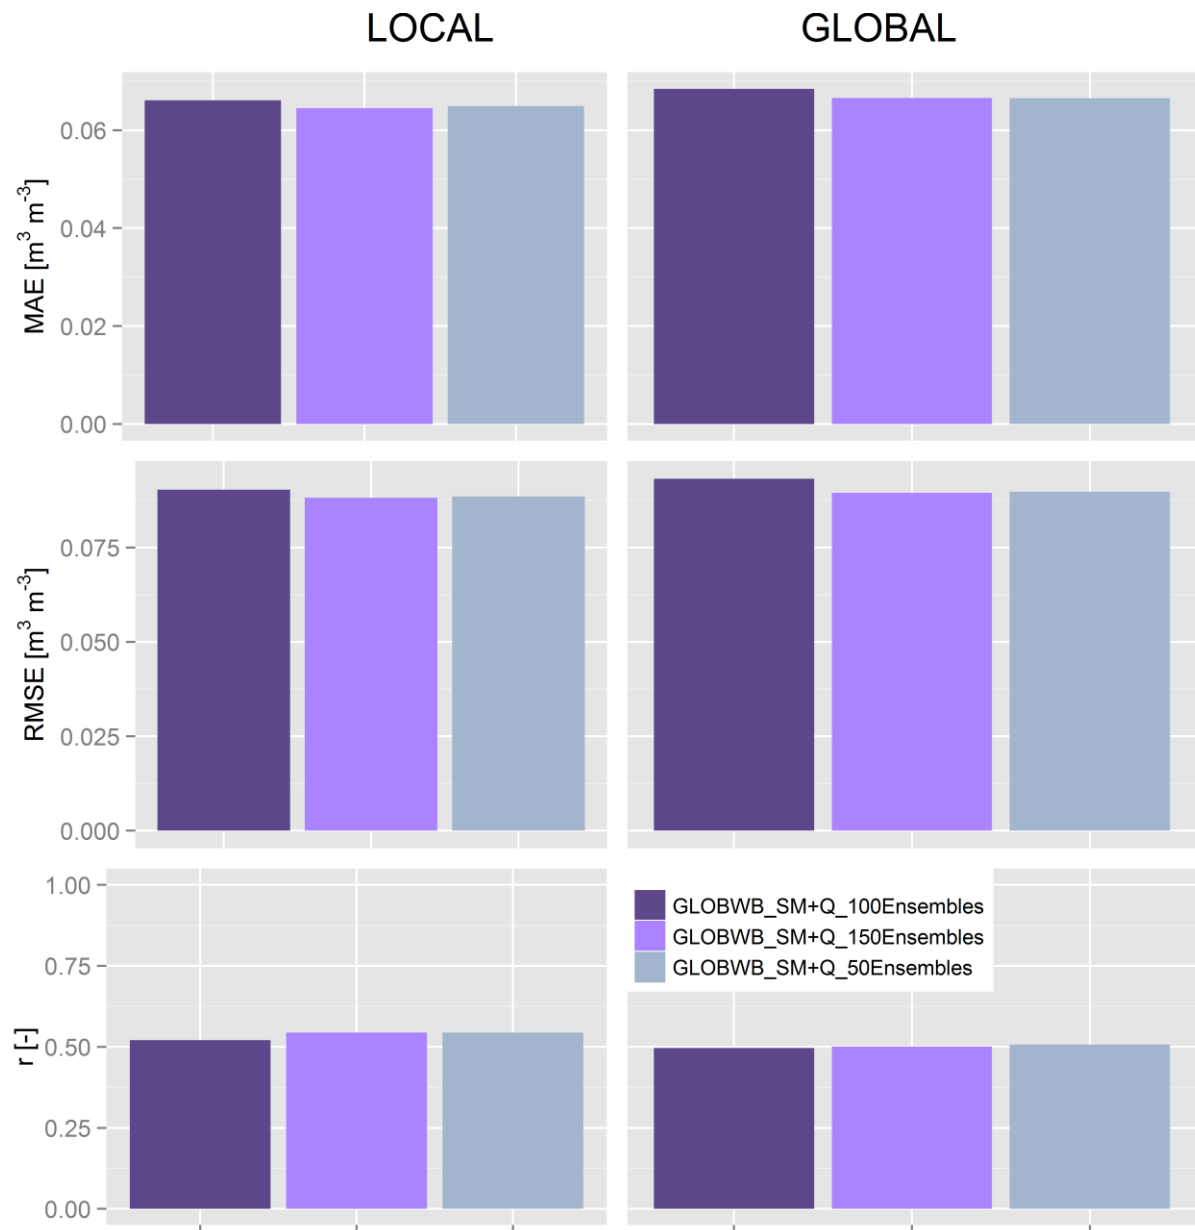

**Figure S1: Comparison of evaluation results of the catchment daily means of soil moisture in the Murrumbidgee river basin. Assimilation scenario GLOBWB\_SM\_Q has been reproduced using 50, 100 and 150 ensemble members.**

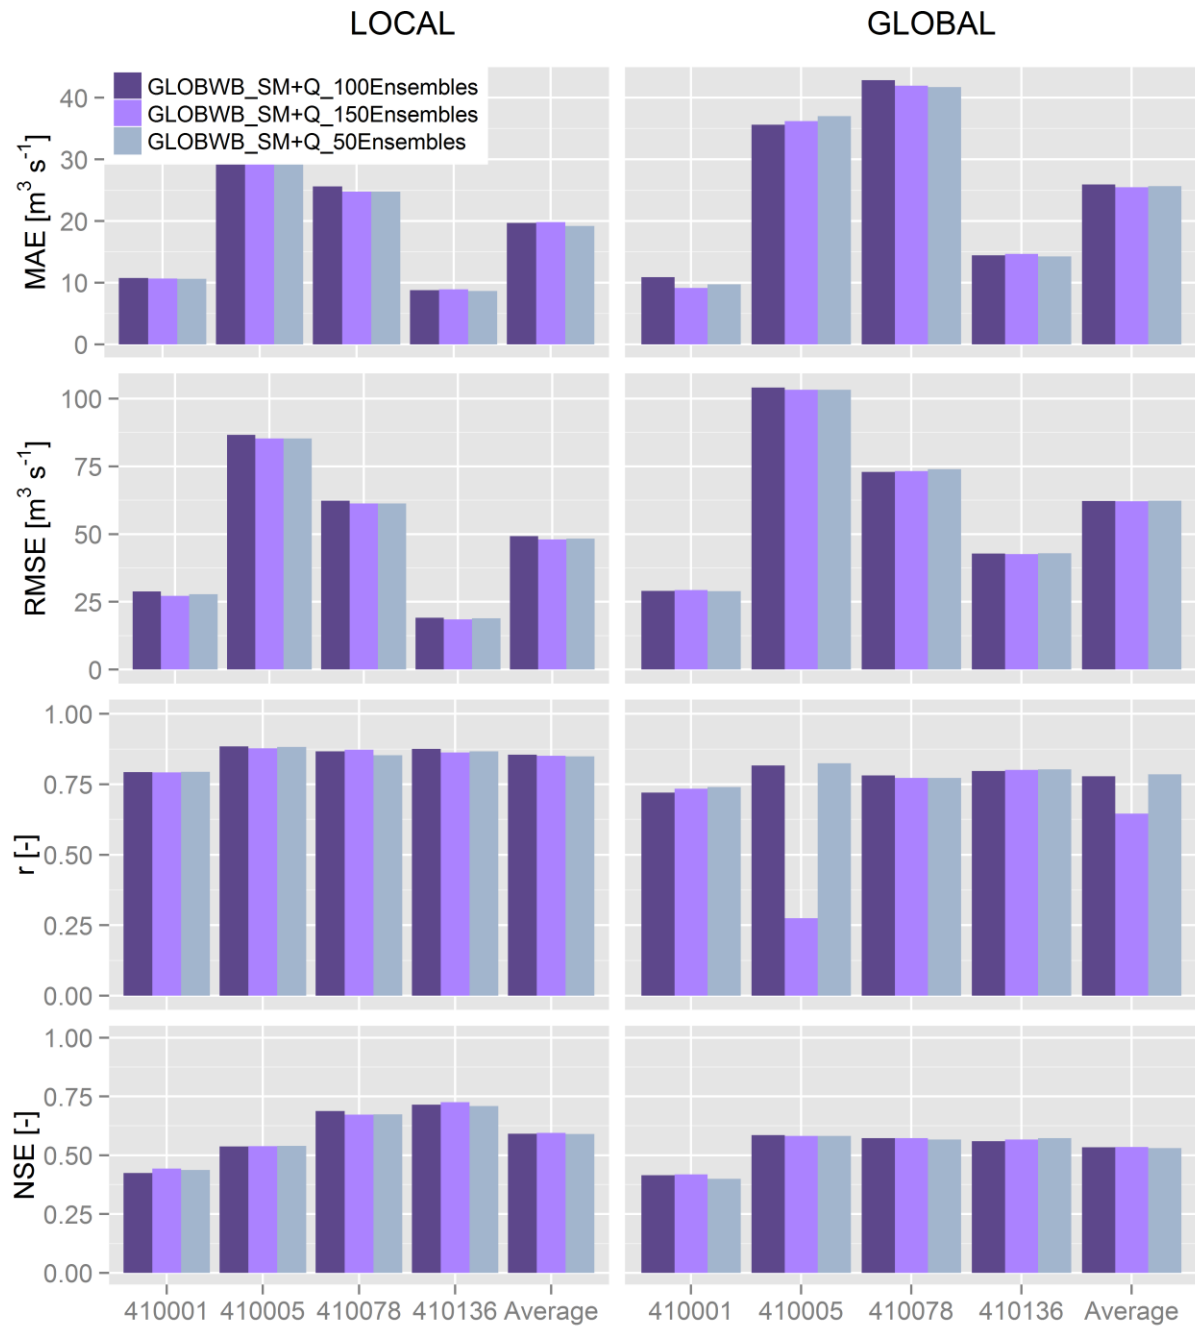

**Figure S2: Comparison of evaluation results for streamflow estimates at 410001, 410005, 410078 and 410136 locations in the Murrumbidgee river. Assimilation scenario GLOBWB\_SM\_Q has been reproduced using 50, 100 and 150 ensemble members.**

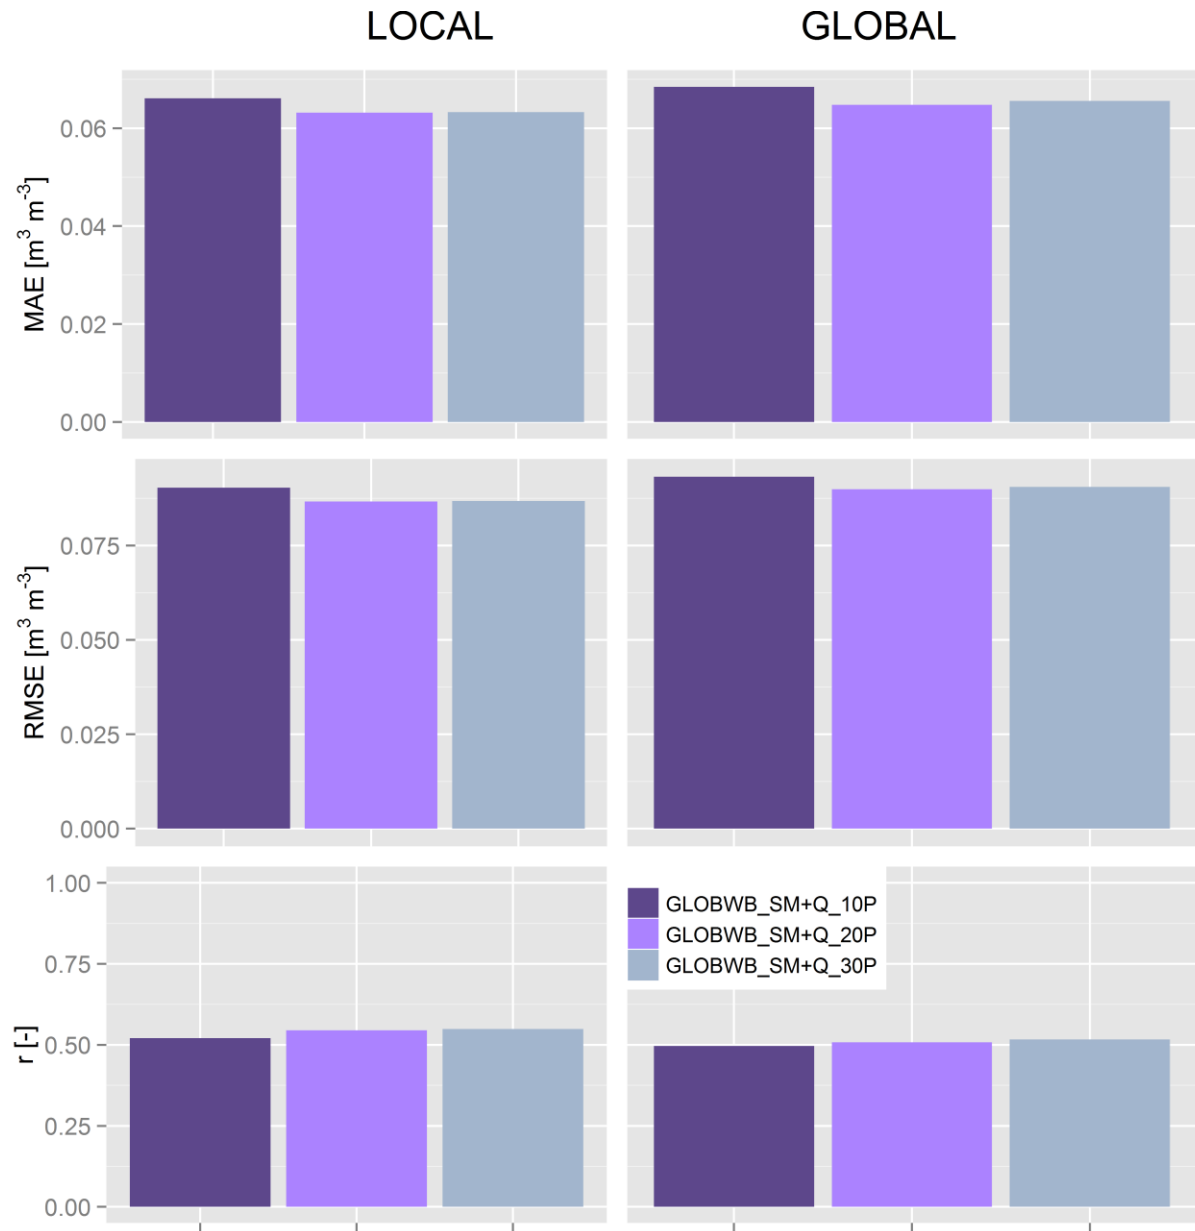

**Figure S3: Comparison of evaluation results of the catchment daily means of soil moisture in the Murrumbidgee river basin. Assimilation scenario GLOBWB\_SM\_Q has been reproduced perturbing the precipitation with additive Gaussian white noise with standard deviation of 10 %, 20 % and 30 % of the nominal value.**

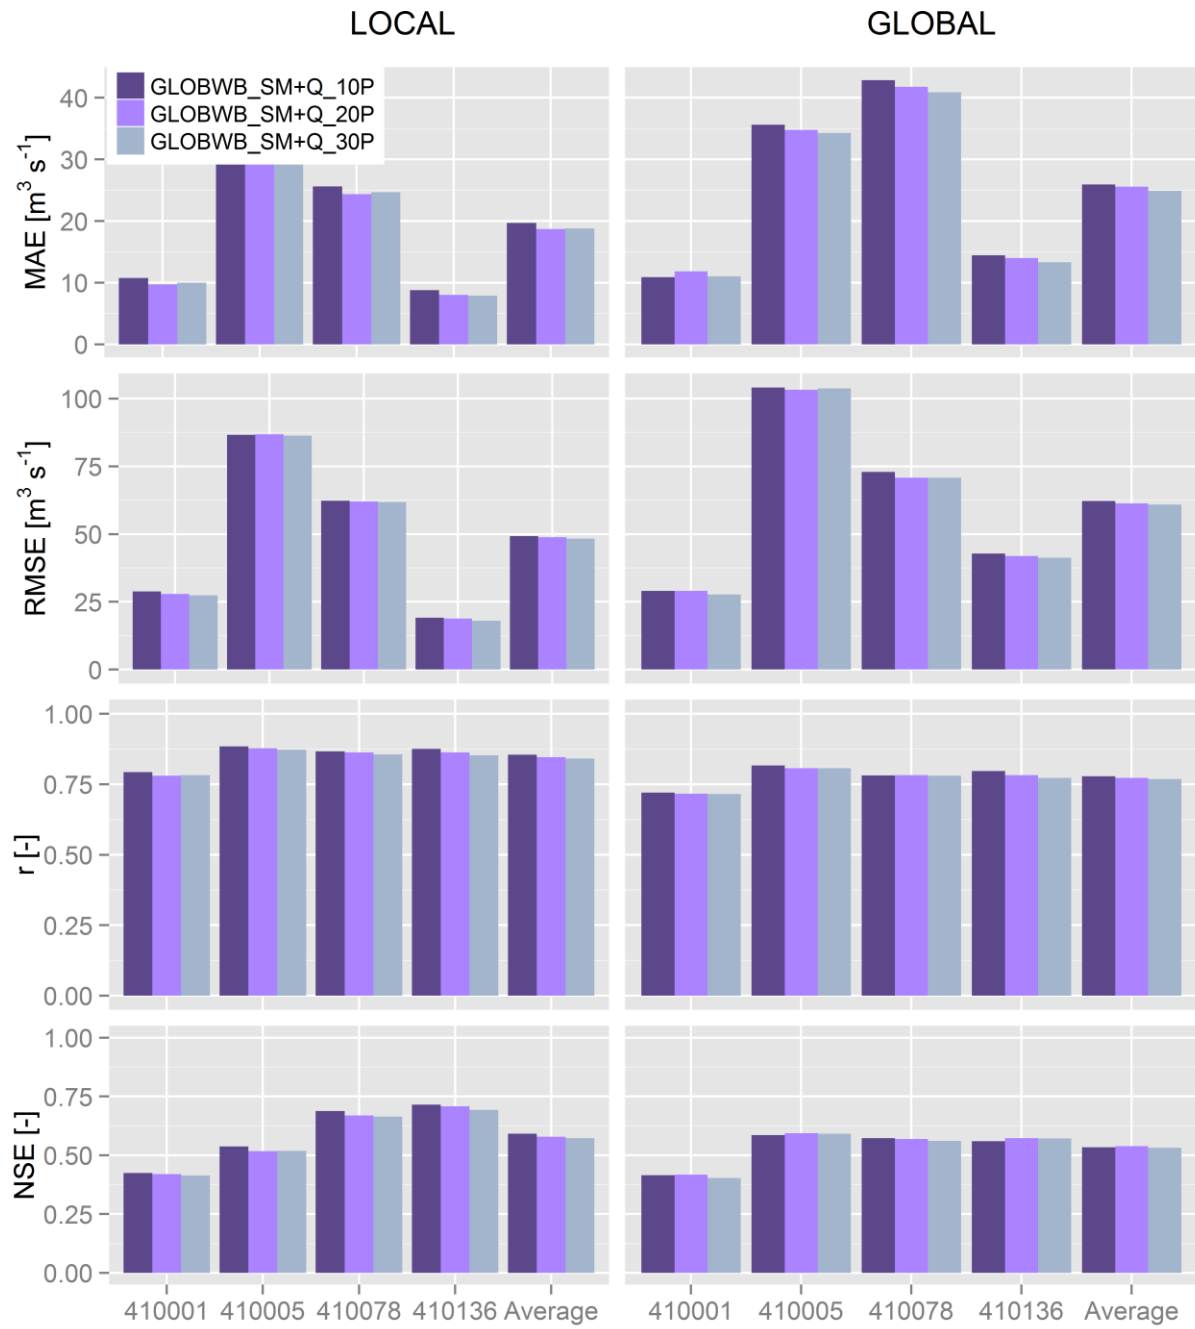

**Figure S4: Comparison of evaluation results for streamflow estimates at 410001, 410005, 410078 and 410136 locations in the Murrumbidgee river. Assimilation scenario GLOBWB\_SM\_Q has been reproduced perturbing the precipitation with additive Gaussian white noise with standard deviation of 10 %, 20 % and 30 % of the nominal value.**

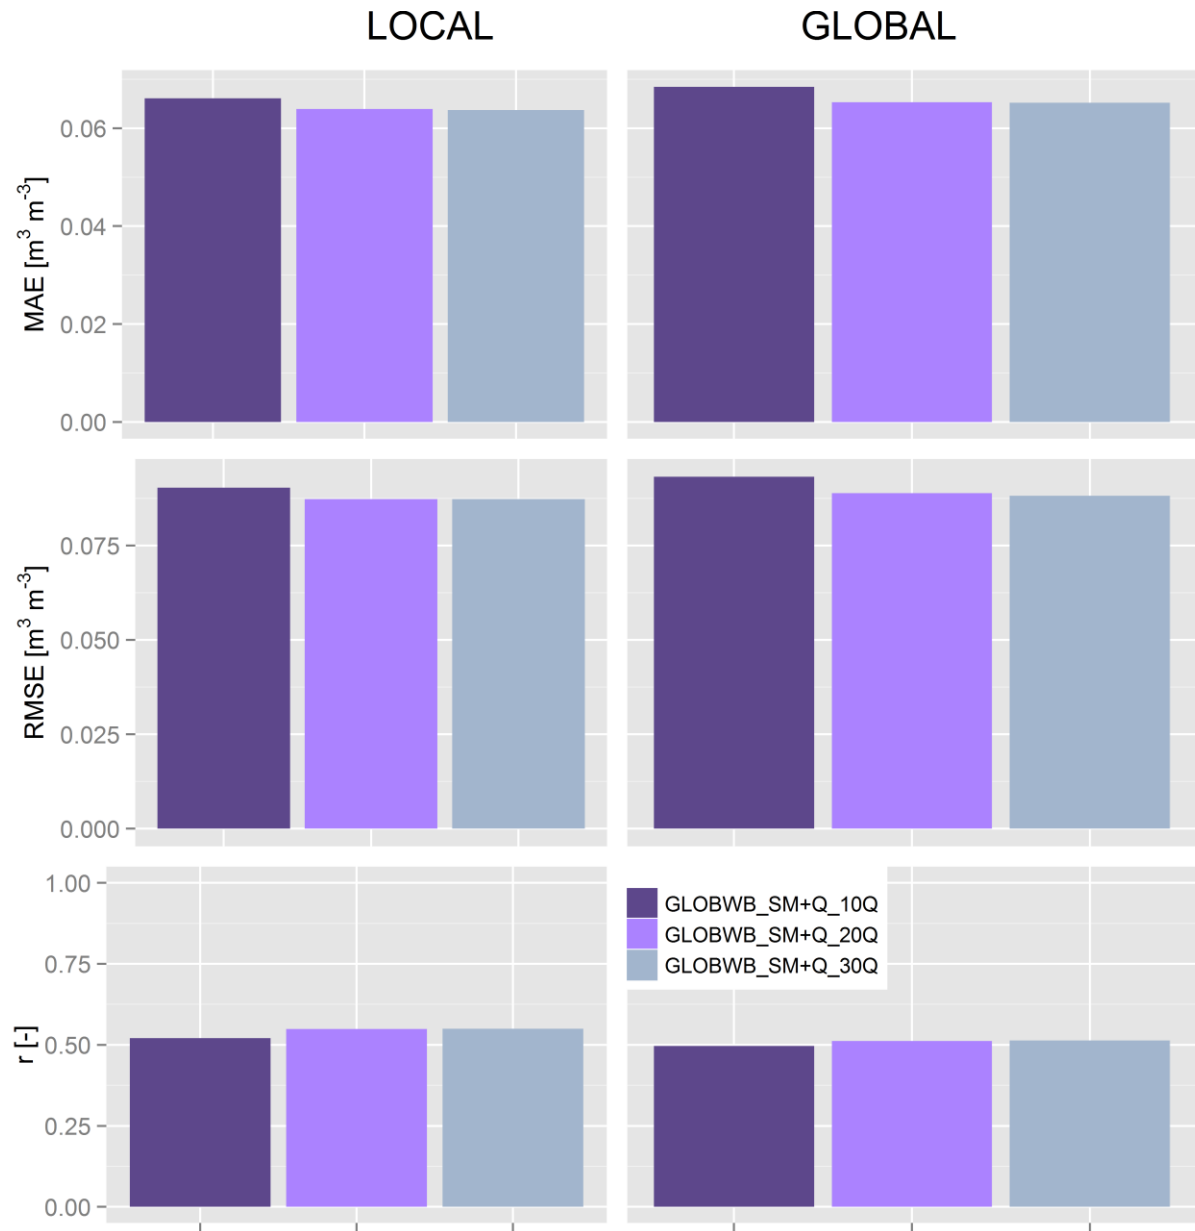

**Figure S5: Comparison of evaluation results of the catchment daily means of soil moisture in the Murrumbidgee river basin. Assimilation scenario GLOBWB\_SM\_Q has been reproduced setting a standard error for the discharge observations of 10 %, 20 % and 30 % of the discharge.**

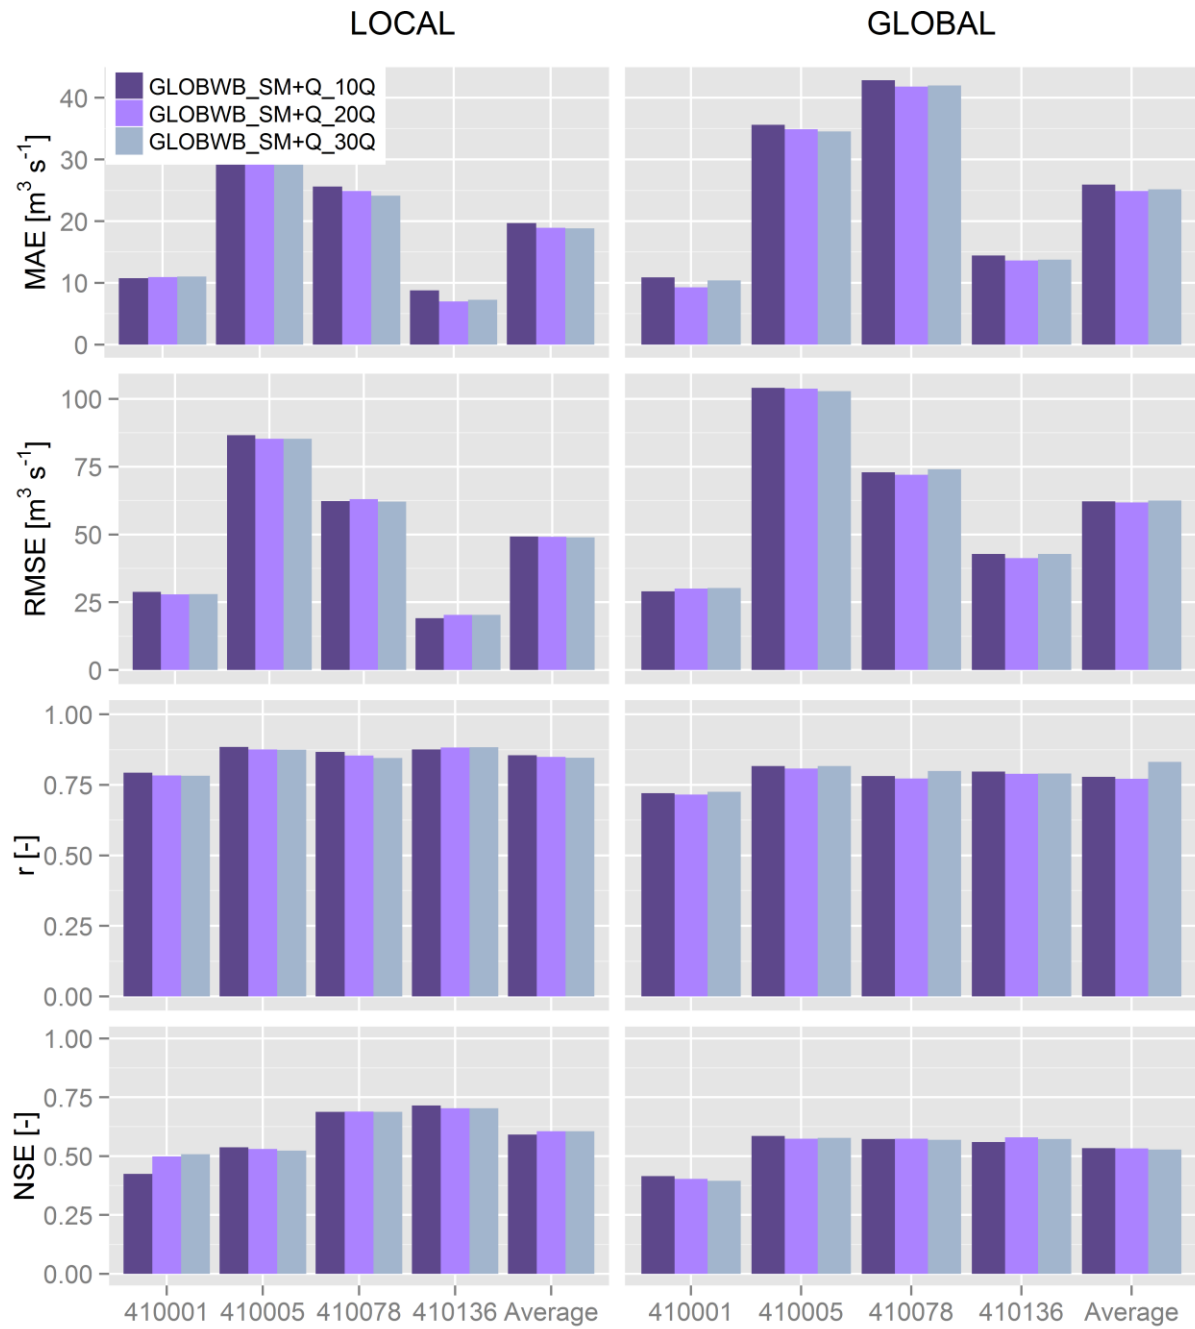

**Figure S6: Comparison of evaluation results for streamflow estimates at 410001, 410005, 410078 and 410136 locations in the Murrumbidgee river. Assimilation scenario GLOBWB\_SM\_Q has been reproduced setting a standard error for the discharge observations of 10 %, 20 % and 30 %  $df_{\text{discharge}}$ .**

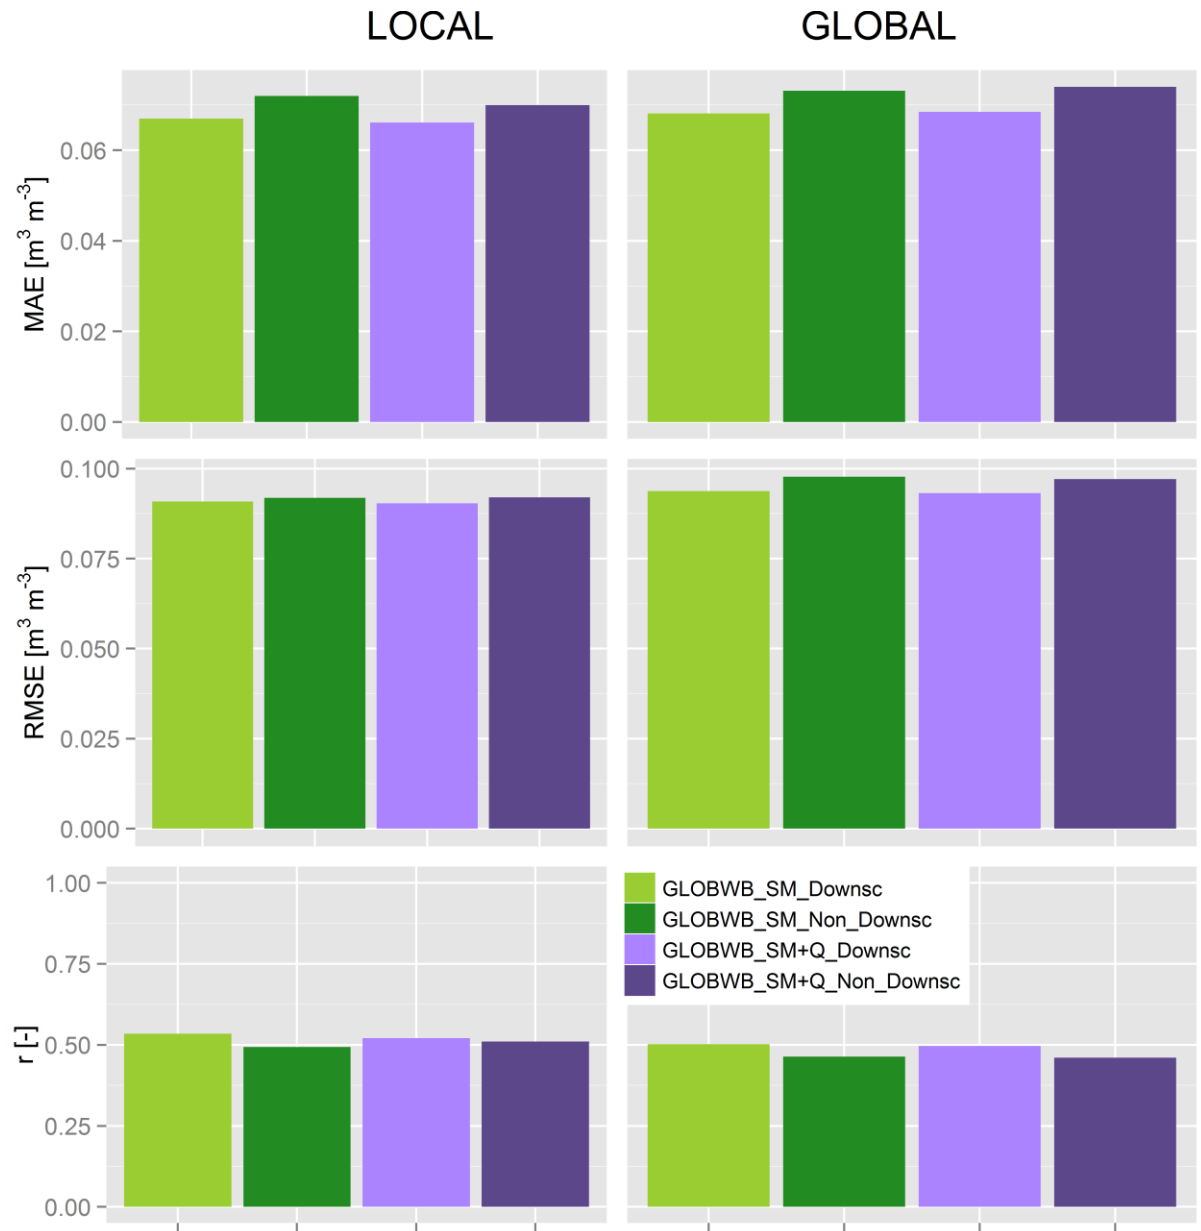

**Figure S7: Comparison of evaluation results of the catchment daily means of soil moisture in the Murrumbidgee river basin. Assimilation scenarios GLOBWB\_SM (green) and GLOBWB\_SM+Q (purple) are shown when downscaled and non-downscaled soil moisture observations are assimilated.**



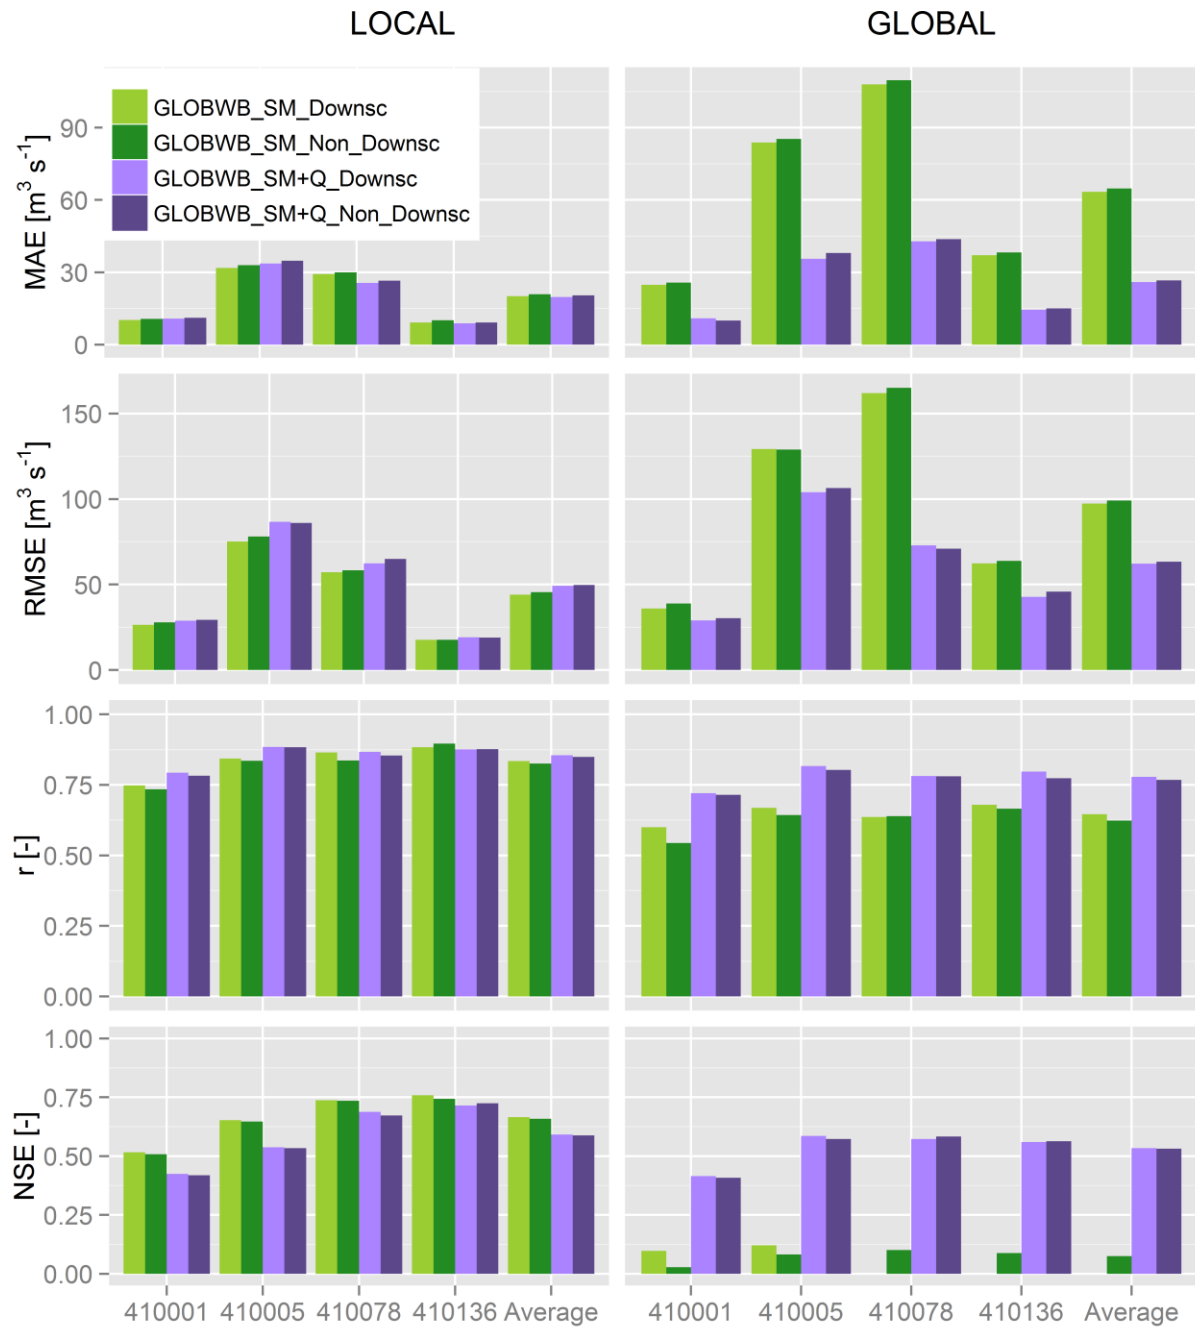

**Figure S8: Comparison of evaluation results for streamflow estimates at 410001, 410005, 410078 and 410136 locations in the Murrumbidgee river. Assimilation scenarios GLOBWB\_SM (green) and GLOBWB\_SM+Q (purple) are shown when downscaled and non-downscaled soil moisture observations are assimilated.**
